# Supplementary material for: Relationship between serum lipid level and meibomian gland dysfunction subtype in Korea : A propensity score analysis
Source: Research Square preprint supplement (doi:10.21203/rs.3.rs-409763/v1), 2021-05-07
Supplement: Supplementary file 1 [file 751f47d1fc6c0f6370b06a2b.docx]

**Supplement Table 1. Clinical characteristics of patients for pre-PSM.**

MGD=meibomian gland dysfunction, OSDI=Ocular surface disease index, MG=meibomian gland, LLT=lipid layer thickness, TG=triglyceride, HDL= high-density lipoprotein, LDL= Low-density lipoprotein

| **Characteristics** | **MGD patients** | **Control patients** | **P-value** |
| --- | --- | --- | --- |
| **values** | |
| **No. of patients** | 95 | 2924 |  |
| **Age(year)** | 57.513.2 | 48±15.7 | <.0001 |
| **Age(year) range** | 19-86 | 19-80 |  |
| **Age distribution** |  | |  |
| <45(%) | 16(16.8) | 1313(44.9) | <.0001 |
| 45-64(%) | 47(49.5) | 1090(37.3) |
| >65(%) | 32(32.7) | 521(17.8) |
| **Gender** |  |  |  |
| Men (%) | 15(15.8) | 1491(51) | <.0001 |
| Women (%) | 80(84.2) | 1433(49) |
| **Lipid profile** | | |  |
| Total cholesterol(mg/dL)  (normal value: < 200) | 193±33.9 | 189.7±36.9 | 0.395 |
| Triglyceride(mg/dL)  (normal value: 34-143) | 127.2±75.3 | 132.7±112.8 | 0.6331 |
| HDL(mg/dL)  (normal value: 40-60) | 63.1±14.7 | 50.2±12.3 | <.0001 |
| LDL(mg/dL)  (normal value: <140) | 109.7±29.5 | 114±31.3* | 0.2079* |

Values are presented as mean standard deviation (range) or number (%).

HDL= high-density lipoprotein, LDL= Low-density lipoprotein

OSDI = Ocular surface disease index,IOP = intraocular pressure, TUBT= tear film break-up time

* Since KNHAES did not conduct an LDL survey in 2012, we further analyzed the LDL data from 2015.
